# Supplementary material
Source: publisher figshare collection journal article supplement (https://acs.figshare.com/ndownloader/files/25408411)
Supplement: Supplementary file 1 [file 25408411]

# Supporting Information

## Atomic Layer Deposition of Nanometer-Sized CeO<sub>2</sub> Layers in Ordered Mesoporous ZrO<sub>2</sub> Films and Their Impact on the Ionic/Electronic Conductivity

*Pascal Cop<sup>a,b</sup>, Erdogan Celik<sup>a,b</sup>, Kevin Hess<sup>a,b</sup>, Yannik Moryson<sup>a,b</sup>, Philip Klement<sup>b,c</sup>,*

*Matthias T. Elm<sup>a,b,\*</sup>, Bernd M. Smarsly<sup>a,b,\*</sup>*

a. Physikalisch-Chemisches Institut, Justus-Liebig University, Heinrich-Buff-Ring 17,

D-35392 Giessen, Germany

b. Center of Materials Research, Justus-Liebig University, Heinrich-Buff-Ring 16, D-

35392 Giessen, Germany.

c. Institute of Experimental Physics I, Justus-Liebig University, Heinrich-Buff-Ring 16,

D-35392 Giessen, Germany.



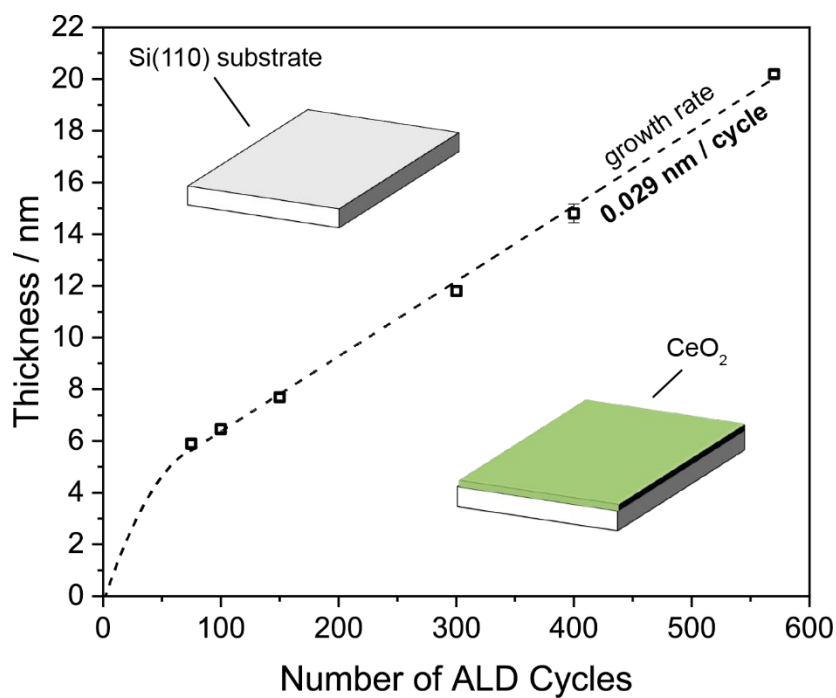

**Figure S1:** Thickness of the  $\text{CeO}_2$ -deposited Si[110] substrates in dependency of the number of ALD cycles. The dashed line illustrates the assumption concerning the growth rate.

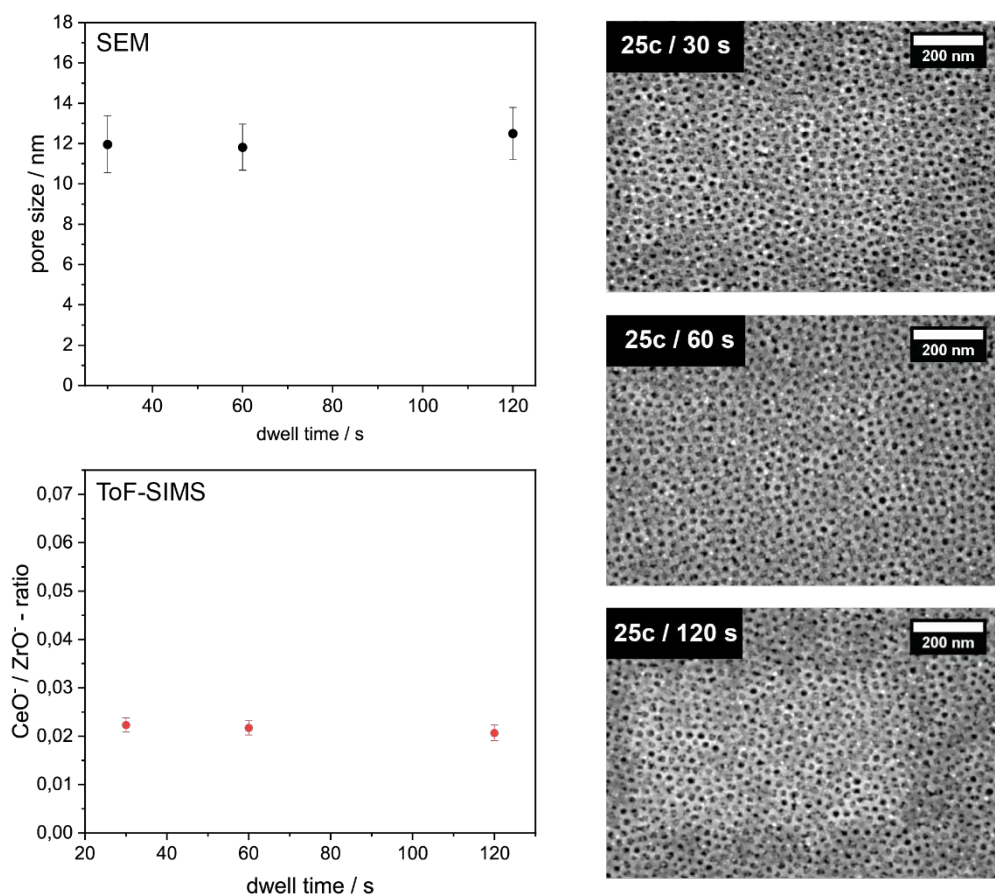

**Figure S2:** SEM and ToF-SIMS analyses of the  $\text{CeO}_2$ -coated  $\text{ZrO}_2$  thin films after 25c with different dwell time. No significant differences are observed proving that the saturation of the precursor chemisorption is already performed after 30s.

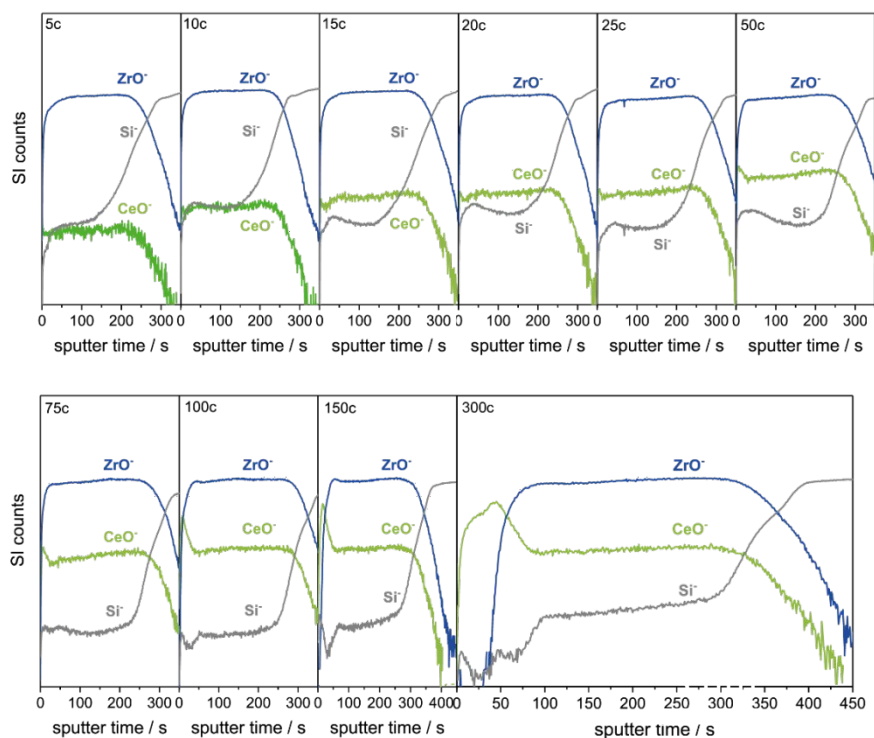

**Figure S3:** ToF-SIMS depth profiles of the mesoporous  $\text{ZrO}_2$  film after different amount of ALD cycles. Next to the ions deriving from the thin film ( $\text{ZrO}^+$  and  $\text{CeO}^+$ ) the signal from the utilized silicon substrate ( $\text{Si}^+$ ) is depicted by plotting the secondary ion (SI) counts logarithmic dependent on the sputter time.

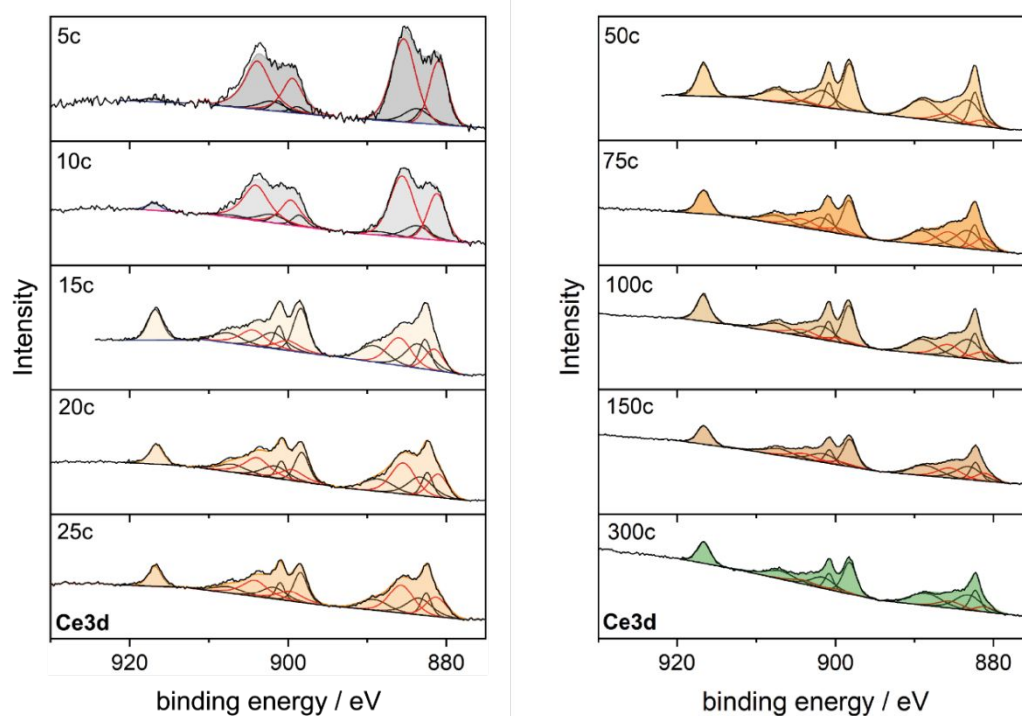

**Figure S4:**  $\text{Ce3d}$  spectra of the  $\text{CeO}_2$ -coated  $\text{ZrO}_2$  thin films using XPS. Next to the six signals deriving from  $\text{CeO}_2$  ( $v$ ,  $v''$ ,  $v'''$  and  $u$ ,  $u''$ ,  $u'''$ ), the four additional signals from  $\text{Ce}_2\text{O}_3$  ( $v_0$ ,  $v'$  and  $u_0$ ,  $u'$ ) were taken into account.

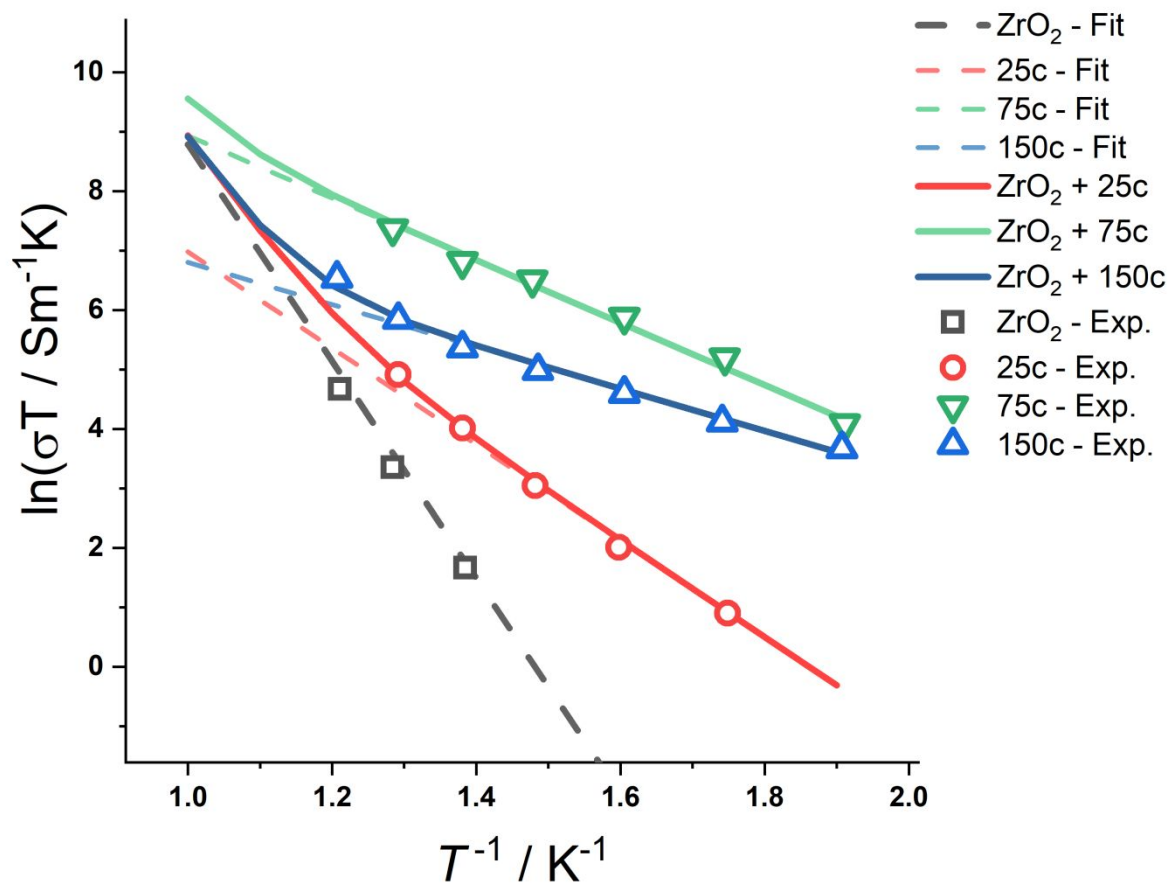

**Figure S5:** Arrhenius plots of the total conductivity and the corresponding fits for the uncoated  $\text{ZrO}_2$  film, after 25, 75 and 150 ALD cycles.
